# Supplementary material for: Effect of bisphosphonate treatment of titanium surfaces on alkaline phosphatase activity in osteoblasts: a systematic review and meta-analysis
Source: Springer Nature journal article supplement (doi:10.1186/s12903-020-01089-4), 2020-04-25

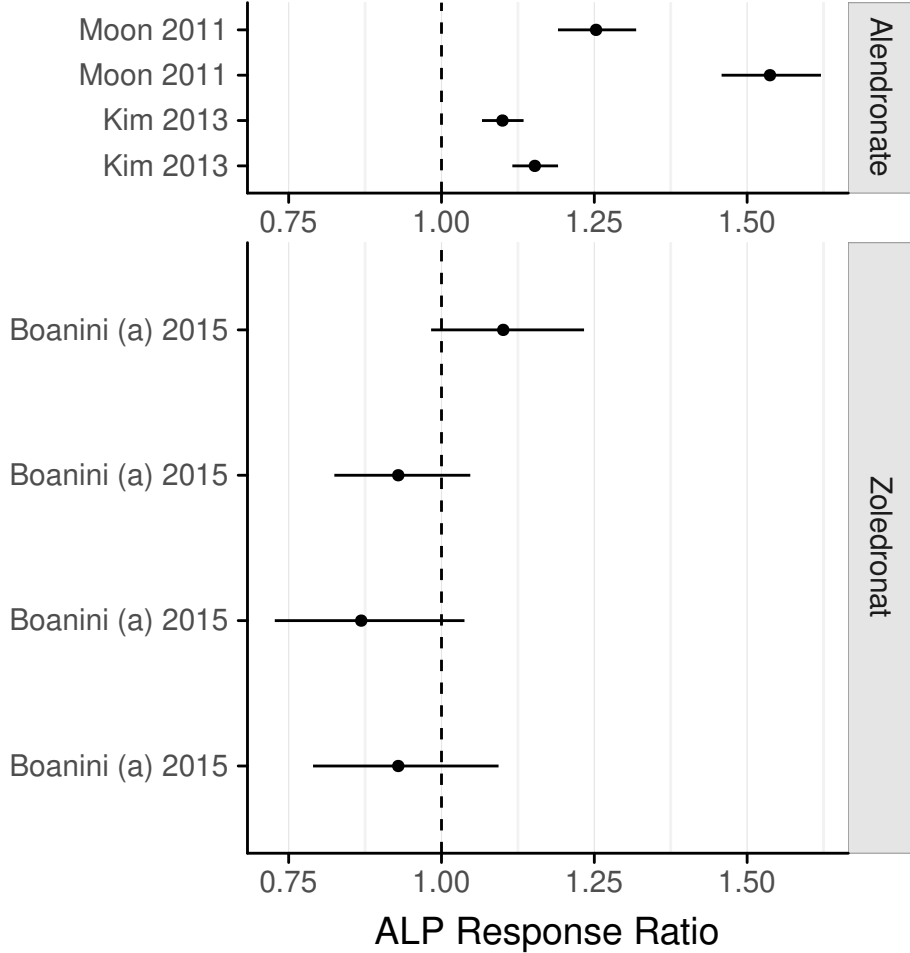

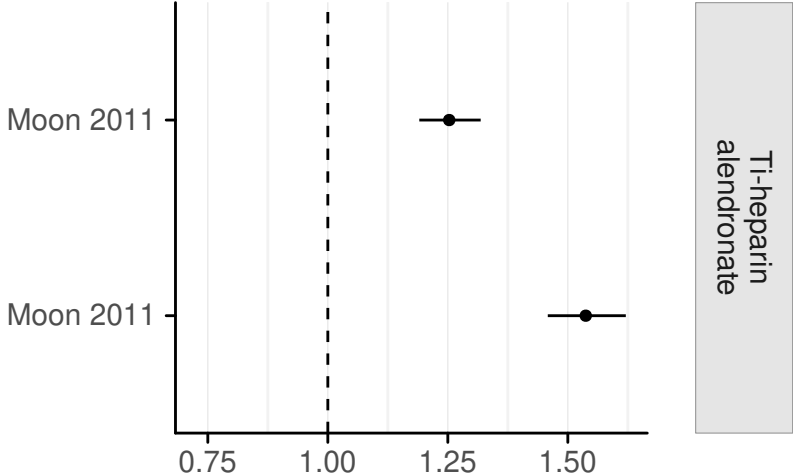

Ti-heparin  
alendronate

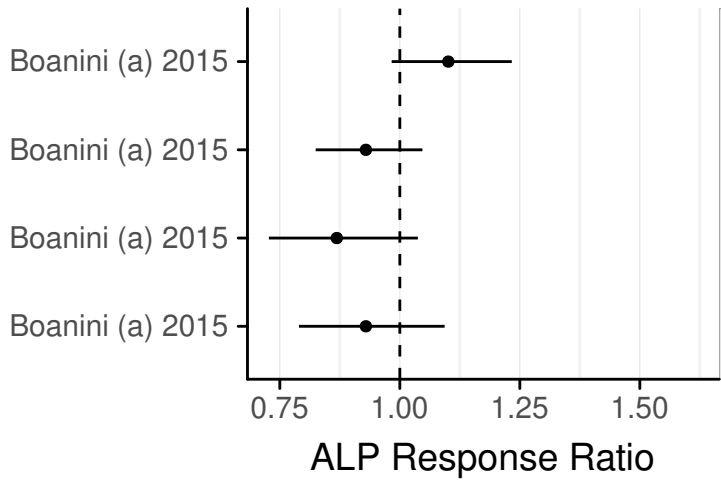

Coculture  
with OC,  
Strontium-substituted  
hydroxyapatite  
(SrHA)

ALP Response Ratio

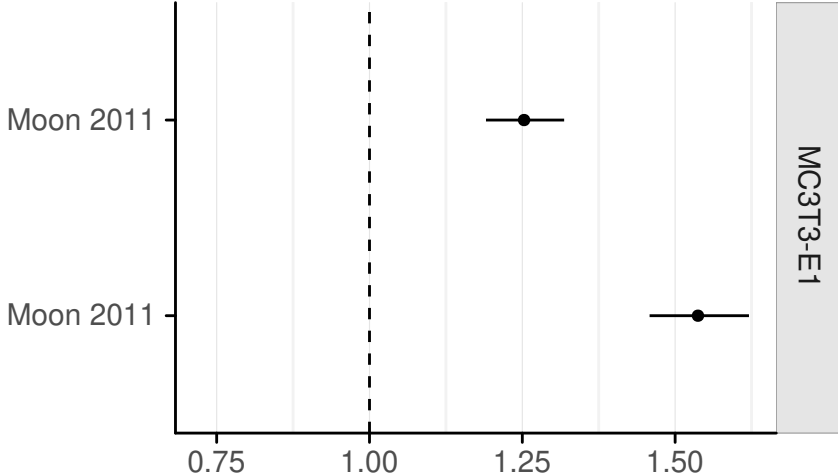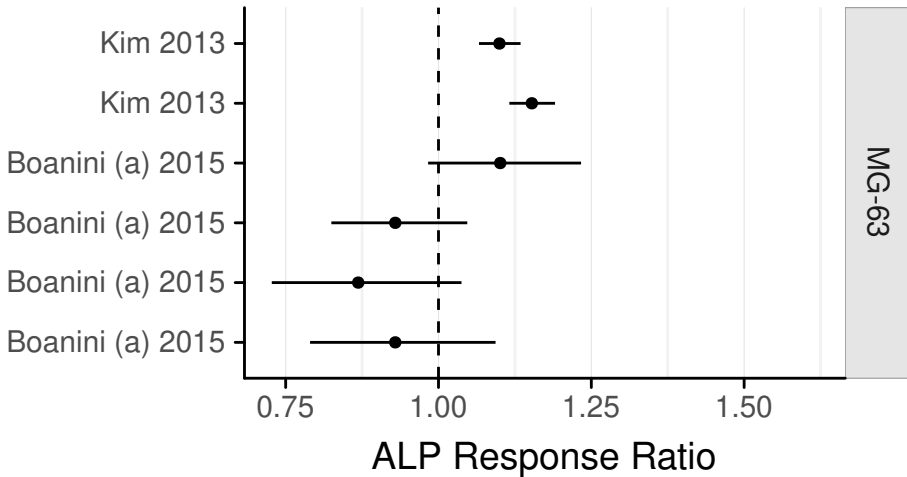

Supplement: MOESM3 [file 17928604]
